# Supplementary material for: Perspectives on the Happiness of Community-Dwelling Elderly in Korea
Source: PubMed Central journal article supplement — Psychiatry Investig. 2015 Oct 27;13(1):50–7. doi: 10.4306/pi.2016.13.1.50 (PMC4701685; doi:10.4306/pi.2016.13.1.50), 2015-10-27
Supplement: pi-13-50-s001.pdf [file pi-13-50-s001.pdf]

## Supplement. Happy aging scale\*

1. Please candidly answer the following questions

| Items                                                                          | Absolutely not | No | Yes | Absolutely yes |
|--------------------------------------------------------------------------------|----------------|----|-----|----------------|
| 1 I can afford to buy what I want.                                             | ①              | ②  | ③   | ④              |
| 2 I am proud of my entire life.                                                | ①              | ②  | ③   | ④              |
| 3 I enjoy my leisure life (e.g., by gardening, hiking, reading, and knitting). | ①              | ②  | ③   | ④              |
| 4 I am trying to improve myself.                                               | ①              | ②  | ③   | ④              |
| 5 Religion is important in my life.                                            | ①              | ②  | ③   | ④              |
| 6 My children have close and loving relationships with each other.             | ①              | ②  | ③   | ④              |
| 7 I have good relationships with my relatives.                                 | ①              | ②  | ③   | ④              |
| 8 My spouse (or partner) and I recognize and respect each other.               | ①              | ②  | ③   | ④              |
| 9 I have friends or neighbors who are as close to me as my family.             | ①              | ②  | ③   | ④              |
| 10 I have a pleasant appearance.                                               | ①              | ②  | ③   | ④              |
| 11 I am not greedy, and I try to think positively.                             | ①              | ②  | ③   | ④              |
| 12 I am not confident about my health.                                         | ④              | ③  | ②   | ①              |
| 13 I have the financial means to manage my life.                               | ①              | ②  | ③   | ④              |
| 14 I am satisfied with what I have accomplished in my life.                    | ①              | ②  | ③   | ④              |
| 15 I often enjoy leisure activities or exercise.                               | ①              | ②  | ③   | ④              |
| 16 I think I am a capable person.                                              | ①              | ②  | ③   | ④              |
| 17 I feel peace of mind through religious activities.                          | ①              | ②  | ③   | ④              |
| 18 My children have grown up well, without serious problems.                   | ①              | ②  | ③   | ④              |
| 19 I converse with my spouse or partner frequently.                            | ①              | ②  | ③   | ④              |
| 20 I do not like to mingle with people.                                        | ④              | ③  | ②   | ①              |
| 21 I am younger and healthier than my peer group.                              | ①              | ②  | ③   | ④              |
| 22 I have a satisfactory sexual life with my spouse or partner.                | ①              | ②  | ③   | ④              |
| 23 I have good relationships with the people around me.                        | ①              | ②  | ③   | ④              |
| 24 My lifestyle, such as my sleeping habits and my diet, is satisfactory.      | ①              | ②  | ③   | ④              |
| 25 I am recognized by others due to my social status.                          | ①              | ②  | ③   | ④              |

2. What is your happiness score out of 100?

(\_\_\_\_/100)

3. What do you need to be happier? (e.g., weight loss, health, etc.)

\_\_\_\_\_

\_\_\_\_\_

\*If you want to get the Korean version of Happy aging scale, please contact the corresponding author.
